# Supplementary material for: Comparative Transcriptome and Weighted Gene Co-expression Network Analysis Identify Key Transcription Factors of Rosa chinensis ‘Old Blush’ After Exposure to a Gradual Drought Stress Followed by Recovery
Source: Front Genet. 2021 Jul 15;12:690264. doi: 10.3389/fgene.2021.690264 (PMC8320538; doi:10.3389/fgene.2021.690264)
Supplement: Supplementary Table 4 — Protein kinases-related genes that were differentially expressed in response to drought treatment. [file Table_4.XLSX]

## Sheet: Sheet1
Supplementary table 4 Protein kinases-related genes that were differentially expressed in response to drought treatment
Gene id	Gene name	Description	Log2 fold change(DT1/CK)	Log2 fold change(DT2/CK)	Log2 fold change(DT3/CK)	Log2 fold change(RW/CK)
RchiOBHm_Chr5g0061451	MPK3	PREDICTED: mitogen-activated protein kinase 3 [Fragaria vesca subsp. vesca] [Fragaria vesca]	-2.61554	/	/	/
RchiOBHm_Chr2g0158821	MAPKKK18	PREDICTED: mitogen-activated protein kinase kinase kinase A [Fragaria vesca subsp. vesca] [Fragaria vesca]	4.12433	3.84398	4.11103	4.51096
RchiOBHm_Chr5g0002581	MAPKKK18	PREDICTED: mitogen-activated protein kinase kinase kinase NPK1-like [Fragaria vesca subsp. vesca] [Fragaria vesca]	2.73697	2.72379	3.53681	/
RchiOBHm_Chr4g0417171	NPK1	PREDICTED: mitogen-activated protein kinase kinase kinase NPK1 [Fragaria vesca subsp. vesca] [Fragaria vesca]	1.20114	/	1.28744	1.24493
RchiOBHm_Chr2g0150341	MKK4	PREDICTED: mitogen-activated protein kinase kinase 5-like [Fragaria vesca subsp. vesca] [Fragaria vesca]	-8.33688	/	/	-8.33688
RchiOBHm_Chr7g0178621	MPK9	PREDICTED: mitogen-activated protein kinase 9-like [Fragaria vesca subsp. vesca] [Fragaria vesca]	1.18763	/	/	/
RchiOBHm_Chr2g0100581	MPK7	PREDICTED: mitogen-activated protein kinase 7 [Fragaria vesca subsp. vesca] [Fragaria vesca]	-1.69799	/	/	/
RchiOBHm_Chr7g0195511	PHY1	PREDICTED: mitogen-activated protein kinase kinase kinase 7-like [Fragaria vesca subsp. vesca] [Fragaria vesca]	5.77961	2.53605	2.95523	6.31872
RchiOBHm_Chr5g0035071	THE1	PREDICTED: receptor-like protein kinase THESEUS 1 [Fragaria vesca subsp. vesca] [Fragaria vesca]	1.79924	/	-3.96272	/
RchiOBHm_Chr3g0492421	TMK1	PREDICTED: probable receptor protein kinase TMK1 [Fragaria vesca subsp. vesca] [Fragaria vesca]	2.01142	1.22982	-3.91107	/
RchiOBHm_Chr6g0286591	MIK1	PREDICTED: leucine-rich repeat receptor-like protein kinase PXL2 [Fragaria vesca subsp. vesca] [Fragaria vesca]	8.17991	8.02237	10.159	7.98489
RchiOBHm_Chr2g0113631	XA21	PREDICTED: probable LRR receptor-like serine/threonine-protein kinase At3g47570 [Fragaria vesca subsp. vesca] [Fragaria vesca]	1.87941	4.07136	/	2.20282
RchiOBHm_Chr2g0113671	--	PREDICTED: probable LRR receptor-like serine/threonine-protein kinase At3g47570 [Fragaria vesca subsp. vesca] [Fragaria vesca]	1.03668	/	-9.60115	/
RchiOBHm_Chr5g0012081	RKF1	PREDICTED: probable LRR receptor-like serine/threonine-protein kinase RFK1 isoform X2 [Fragaria vesca subsp. vesca] [Fragaria vesca]	-3.24823	-4.41382	-3.70839	/
RchiOBHm_Chr6g0292131	RKF3	PREDICTED: probable LRR receptor-like serine/threonine-protein kinase RKF3 [Malus domestica]	-1.9529	-3.04732	-4.58739	/
RchiOBHm_Chr6g0284821	At5g48740	PREDICTED: probable LRR receptor-like serine/threonine-protein kinase At5g48740 [Fragaria vesca subsp. vesca] [Fragaria vesca]	6.01557	3.85244	/	6.4608
RchiOBHm_Chr7g0220681	BAM1	PREDICTED: leucine-rich repeat receptor-like serine/threonine-protein kinase BAM3 [Fragaria vesca subsp. vesca] [Fragaria vesca]	2.22542	/	-3.18057	2.38421
RchiOBHm_Chr3g0460051	At1g06840	PREDICTED: probable LRR receptor-like serine/threonine-protein kinase At1g06840 isoform X1 [Prunus mume]	-1.15674	-1.32091	-1.28711	-1.62064
RchiOBHm_Chr7g0180531	FEI1	PREDICTED: LRR receptor-like serine/threonine-protein kinase FEI 2 [Fragaria vesca subsp. vesca] [Fragaria vesca]	1.24373	/	/	1.61127
RchiOBHm_Chr5g0013311	FLS2	PREDICTED: LRR receptor-like serine/threonine-protein kinase FLS2 [Fragaria vesca subsp. vesca] [Fragaria vesca]	-1.42479	/	-3.79647	-1.2115
RchiOBHm_Chr6g0311931	ERECTA	PREDICTED: LRR receptor-like serine/threonine-protein kinase ERECTA [Fragaria vesca subsp. vesca] [Fragaria vesca]	2.86446	/	-2.82312	3.59732
RchiOBHm_Chr5g0011291	XA21	PREDICTED: probable LRR receptor-like serine/threonine-protein kinase At3g47570 [Fragaria vesca subsp. vesca] [Fragaria vesca]	4.19265	3.55897	/	3.08746
RchiOBHm_Chr5g0011301	--	PREDICTED: LRR receptor-like serine/threonine-protein kinase GSO1 [Erythranthe guttata]	5.2437	3.78427	/	4.20511
RchiOBHm_Chr2g0113761	At3g47570	PREDICTED: probable LRR receptor-like serine/threonine-protein kinase At3g47570 [Fragaria vesca subsp. vesca] [Fragaria vesca]	1.84516	/	-7.07599	/
RchiOBHm_Chr2g0113771	--	PREDICTED: probable LRR receptor-like serine/threonine-protein kinase At3g47570 [Fragaria vesca subsp. vesca] [Fragaria vesca]	1.06105	/	-5.46877	/
RchiOBHm_Chr5g0011311	--	PREDICTED: probable LRR receptor-like serine/threonine-protein kinase At3g47570 [Fragaria vesca subsp. vesca] [Fragaria vesca]	3.4199	2.91467	/	/
RchiOBHm_Chr5g0011271	XA21	PREDICTED: probable LRR receptor-like serine/threonine-protein kinase At3g47570 [Fragaria vesca subsp. vesca] [Fragaria vesca]	1.97461	/	/	/
RchiOBHm_Chr5g0011261	At3g47570	PREDICTED: LOW QUALITY PROTEIN: LRR receptor-like serine/threonine-protein kinase FLS2 [Prunus mume]	1.68202	/	/	/
RchiOBHm_Chr7g0177961	MKK9	MAP kinase kinase 9 [Rosa hybrid cultivar]	-1.37561	/	-1.95322	/
RchiOBHm_Chr7g0242771	SAPK2	PREDICTED: serine/threonine-protein kinase SAPK2-like [Fragaria vesca subsp. vesca] [Fragaria vesca]	-6.46116	-6.53916	-5.62162	-6.12412
RchiOBHm_Chr7g0242721	SAPK2	PREDICTED: serine/threonine-protein kinase SAPK2-like [Fragaria vesca subsp. vesca] [Fragaria vesca]	-4.33703	-5.26303	-11.9069	-2.75207
RchiOBHm_Chr7g0194711	NDPK3	PREDICTED: nucleoside diphosphate kinase 3-like [Fragaria vesca subsp. vesca] [Fragaria vesca]	-1.01026	/	/	-1.12163
RchiOBHm_Chr7g0242791	SAPK2	PREDICTED: serine/threonine-protein kinase SAPK2-like [Fragaria vesca subsp. vesca] [Fragaria vesca]	-1.11849	-2.39899	-4.22463	-2.32871
RchiOBHm_Chr6g0280821	PIX13	PREDICTED: probable serine/threonine-protein kinase NAK [Fragaria vesca subsp. vesca] [Fragaria vesca]	-1.31273	1.10918	/	/
RchiOBHm_Chr1g0352161	MEKK1	PREDICTED: mitogen-activated protein kinase kinase kinase 1 [Jatropha curcas]	/	-1.80126	/	-2.41007
RchiOBHm_Chr6g0294571	--	PREDICTED: mitogen-activated protein kinase kinase kinase 1-like isoform X5 [Fragaria vesca subsp. vesca] [Fragaria vesca]	/	-3.36457	/	-2.51658
RchiOBHm_Chr6g0301651	NTF3	PREDICTED: mitogen-activated protein kinase homolog NTF3 [Fragaria vesca subsp. vesca] [Fragaria vesca]	/	-2.18409	/	/
RchiOBHm_Chr7g0211301	MKK10	PREDICTED: mitogen-activated protein kinase kinase 10 [Fragaria vesca subsp. vesca] [Fragaria vesca]	/	9.17991	8.11201	/
RchiOBHm_Chr7g0240941	MEKK1	PREDICTED: mitogen-activated protein kinase kinase kinase 1-like [Fragaria vesca subsp. vesca] [Fragaria vesca]	/	1.41242	1.02097	/
RchiOBHm_Chr7g0196781	MPK4	PREDICTED: mitogen-activated protein kinase 4-like [Fragaria vesca subsp. vesca] [Fragaria vesca]	/	1.41612	2.08666	/
RchiOBHm_Chr5g0061751	NTF6	PREDICTED: mitogen-activated protein kinase homolog NTF6 [Fragaria vesca subsp. vesca] [Fragaria vesca]	/	1.54456	3.29676	/
RchiOBHm_Chr2g0114031	--	PREDICTED: probable LRR receptor-like serine/threonine-protein kinase At3g47570 [Fragaria vesca subsp. vesca] [Fragaria vesca]	/	-1.41168	-10.8968	/
RchiOBHm_Chr5g0011331	At3g47570	PREDICTED: probable LRR receptor-like serine/threonine-protein kinase At3g47570 [Fragaria vesca subsp. vesca] [Fragaria vesca]	/	2.55479	2.57866	/
RchiOBHm_Chr5g0011341	XA21	PREDICTED: probable LRR receptor-like serine/threonine-protein kinase At3g47570 [Fragaria vesca subsp. vesca] [Fragaria vesca]	/	4.1838	4.30193	-7.22882
RchiOBHm_Chr5g0011691	XA21	PREDICTED: probable LRR receptor-like serine/threonine-protein kinase At3g47570 [Fragaria vesca subsp. vesca] [Fragaria vesca]	/	-4.49185	-2.46437	/
RchiOBHm_Chr6g0277691	--	PREDICTED: probable LRR receptor-like serine/threonine-protein kinase At3g47570 [Fragaria vesca subsp. vesca] [Fragaria vesca]	/	1.88319	/	/
RchiOBHm_Chr6g0277701	XA21	PREDICTED: probable LRR receptor-like serine/threonine-protein kinase At3g47570 [Fragaria vesca subsp. vesca] [Fragaria vesca]	/	1.15181	-3.13711	/
RchiOBHm_Chr2g0112461	SAPK2	PREDICTED: serine/threonine-protein kinase SAPK1 [Fragaria vesca subsp. vesca] [Fragaria vesca]	/	-1.22824	-1.90857	/
RchiOBHm_Chr6g0283431	OXI1	PREDICTED: serine/threonine-protein kinase OXI1 [Fragaria vesca subsp. vesca] [Fragaria vesca]	/	1.20232	/	/
RchiOBHm_Chr7g0205831	SAPK3	PREDICTED: serine/threonine-protein kinase SAPK2-like [Fragaria vesca subsp. vesca] [Fragaria vesca]	/	-1.64667	/	/
RchiOBHm_Chr7g0242711	SAPK2	PREDICTED: serine/threonine-protein kinase SAPK2-like isoform X2 [Fragaria vesca subsp. vesca] [Fragaria vesca]	/	2.8057	/	1.14249
RchiOBHm_Chr7g0242781	SAPK2	PREDICTED: serine/threonine-protein kinase SAPK2-like [Fragaria vesca subsp. vesca] [Fragaria vesca]	/	-1.60385	-2.45844	-1.67465
RchiOBHm_Chr2g0084791	ILK1	PREDICTED: dual specificity protein kinase shkC-like [Fragaria vesca subsp. vesca] [Fragaria vesca]	/	1.26025	/	/
RchiOBHm_Chr1g0357171	MMK2	PREDICTED: mitogen-activated protein kinase homolog MMK2 [Fragaria vesca subsp. vesca] [Fragaria vesca]	/	/	1.43433	/
RchiOBHm_Chr2g0172911	MKK3	PREDICTED: mitogen-activated protein kinase kinase 3 [Fragaria vesca subsp. vesca] [Fragaria vesca]	/	/	-1.49441	/
RchiOBHm_Chr7g0197281	YDA	PREDICTED: mitogen-activated protein kinase kinase kinase YODA [Fragaria vesca subsp. vesca] [Fragaria vesca]	/	/	-1.50984	/
RchiOBHm_Chr5g0080301	MEKK1	PREDICTED: mitogen-activated protein kinase kinase kinase 1-like [Fragaria vesca subsp. vesca] [Fragaria vesca]	/	/	-4.4717	/
RchiOBHm_Chr5g0028971	MPK19	PREDICTED: mitogen-activated protein kinase 19 [Fragaria vesca subsp. vesca] [Fragaria vesca]	/	/	1.05939	/
RchiOBHm_Chr2g0092161	MKK6	PREDICTED: mitogen-activated protein kinase kinase 6 isoform X1 [Fragaria vesca subsp. vesca] [Fragaria vesca]	/	/	1.46059	/
RchiOBHm_Chr2g0113951	At3g47570	PREDICTED: probable LRR receptor-like serine/threonine-protein kinase At3g47570 isoform X2 [Malus domestica]	/	/	-5.05143	/
RchiOBHm_Chr1g0336221	XA21	PREDICTED: probable LRR receptor-like serine/threonine-protein kinase At3g47570 [Fragaria vesca subsp. vesca] [Fragaria vesca]	/	/	-3.45609	-2.13232
RchiOBHm_Chr2g0114381	At3g47570	PREDICTED: LRR receptor-like serine/threonine-protein kinase GSO1 isoform X2 [Prunus mume]	/	/	-3.66297	/
RchiOBHm_Chr5g0079211	RLK1	PREDICTED: G-type lectin S-receptor-like serine/threonine-protein kinase RLK1 [Fragaria vesca subsp. vesca] [Fragaria vesca]	-2.14519	/	-4.2926	-1.05263
RchiOBHm_Chr5g0079131	RLK1	PREDICTED: G-type lectin S-receptor-like serine/threonine-protein kinase RLK1 [Fragaria vesca subsp. vesca] [Fragaria vesca]	-1.94623	/	-4.42411	/
RchiOBHm_Chr5g0079241	RLK1	PREDICTED: G-type lectin S-receptor-like serine/threonine-protein kinase RLK1 [Fragaria vesca subsp. vesca] [Fragaria vesca]	-1.67659	/	-2.74659	/
RchiOBHm_Chr5g0078421	RLK1	PREDICTED: G-type lectin S-receptor-like serine/threonine-protein kinase RLK1 [Prunus mume]	2.79373	1.85536	-4.66297	2.16993
RchiOBHm_Chr7g0217331	RLK7	PREDICTED: receptor-like protein kinase HAIKU2 [Fragaria vesca subsp. vesca] [Fragaria vesca]	-1.26081	/	-2.6853	-1.44602
RchiOBHm_Chr5g0078791	RLK1	PREDICTED: G-type lectin S-receptor-like serine/threonine-protein kinase RLK1 [Prunus mume]	2.5891	2.63387	-7.59495	2.39941
RchiOBHm_Chr5g0012201	LRR-RLK	PREDICTED: probable leucine-rich repeat receptor-like serine/threonine-protein kinase At3g14840 isoform X1 [Fragaria vesca subsp. vesca] [Fragaria vesca]	1.31276	/	-3.82648	/
RchiOBHm_Chr5g0029781	LRR-RLK	PREDICTED: probable leucine-rich repeat receptor-like serine/threonine-protein kinase At3g14840 isoform X2 [Fragaria vesca subsp. vesca] [Fragaria vesca]	-1.5977	-2.90436	-5.09339	-1.10244
MSTRG.22798	RLK1	PREDICTED: G-type lectin S-receptor-like serine/threonine-protein kinase RLK1 [Prunus mume]	1.19804	/	-6.58496	/
RchiOBHm_Chr5g0012251	LRR-RLK	PREDICTED: probable leucine-rich repeat receptor-like serine/threonine-protein kinase At3g14840 [Fragaria vesca subsp. vesca] [Fragaria vesca]	-1.70044	-1.43195	1.6635	-2.91194
RchiOBHm_Chr5g0078641	RLK1	PREDICTED: G-type lectin S-receptor-like serine/threonine-protein kinase RLK1 [Prunus mume]	2.2109	/	/	/
RchiOBHm_Chr0c40g0503421	LRR-RLK	PREDICTED: probable leucine-rich repeat receptor-like serine/threonine-protein kinase At3g14840 [Fragaria vesca subsp. vesca] [Fragaria vesca]	/	-2.61034	-2.69436	-1.36583
RchiOBHm_Chr5g0029631	LRR-RLK	PREDICTED: probable leucine-rich repeat receptor-like serine/threonine-protein kinase At3g14840 [Fragaria vesca subsp. vesca] [Fragaria vesca]	/	-2.30121	-4.75988	/
RchiOBHm_Chr5g0029701	LRR-RLK	PREDICTED: probable leucine-rich repeat receptor-like serine/threonine-protein kinase At3g14840 [Fragaria vesca subsp. vesca] [Fragaria vesca]	/	-1.78233	-3.41828	/
RchiOBHm_Chr5g0029741	LRR-RLK	PREDICTED: probable leucine-rich repeat receptor-like serine/threonine-protein kinase At3g14840 isoform X1 [Fragaria vesca subsp. vesca] [Fragaria vesca]	/	-1.05338	-2.2635	/
RchiOBHm_Chr5g0029791	LRR-RLK	PREDICTED: probable leucine-rich repeat receptor-like serine/threonine-protein kinase At3g14840 isoform X1 [Fragaria vesca subsp. vesca] [Fragaria vesca]	/	-3.23095	-9.13785	/
RchiOBHm_Chr5g0078491	RLK1	PREDICTED: G-type lectin S-receptor-like serine/threonine-protein kinase RLK1 [Prunus mume]	/	1.43251	/	/
RchiOBHm_Chr1g0313471	RLK1	PREDICTED: G-type lectin S-receptor-like serine/threonine-protein kinase RLK1 [Fragaria vesca subsp. vesca] [Fragaria vesca]	/	/	4.17463	/
RchiOBHm_Chr1g0313521	RLK1	PREDICTED: G-type lectin S-receptor-like serine/threonine-protein kinase RLK1 [Fragaria vesca subsp. vesca] [Fragaria vesca]	/	/	4.17463	/
RchiOBHm_Chr5g0029851	LRR-RLK	PREDICTED: probable leucine-rich repeat receptor-like serine/threonine-protein kinase At3g14840 [Fragaria vesca subsp. vesca] [Fragaria vesca]	/	/	-4.8736	/
RchiOBHm_Chr5g0078741	RLK1	PREDICTED: G-type lectin S-receptor-like serine/threonine-protein kinase RLK1 [Prunus mume]	/	/	-3.89416	/
RchiOBHm_Chr5g0078681	RLK1	PREDICTED: G-type lectin S-receptor-like serine/threonine-protein kinase RLK1 [Prunus mume]	/	/	-11.8468	/
RchiOBHm_Chr1g0329041	RLK1	PREDICTED: G-type lectin S-receptor-like serine/threonine-protein kinase RLK1 [Fragaria vesca subsp. vesca] [Fragaria vesca]	/	/	-2.14841	/
RchiOBHm_Chr5g0029771	LRR-RLK	PREDICTED: probable leucine-rich repeat receptor-like serine/threonine-protein kinase At3g14840 isoform X1 [Fragaria vesca subsp. vesca] [Fragaria vesca]	/	/	2.51525	/
RchiOBHm_Chr5g0029891	LRR-RLK	PREDICTED: probable leucine-rich repeat receptor-like serine/threonine-protein kinase At3g14840 [Fragaria vesca subsp. vesca] [Fragaria vesca]	/	/	-7.61102	/
RchiOBHm_Chr5g0078851	RLK1	PREDICTED: G-type lectin S-receptor-like serine/threonine-protein kinase RLK1 [Prunus mume]	/	/	-1.72735	/
RchiOBHm_Chr5g0034061	LRR-RLK	PREDICTED: probable leucine-rich repeat receptor-like serine/threonine-protein kinase At3g14840 [Fragaria vesca subsp. vesca] [Fragaria vesca]	/	/	-3.50815	/
RchiOBHm_Chr7g0222221	LRR-RLK	PREDICTED: probable leucine-rich repeat receptor-like serine/threonine-protein kinase At3g14840 isoform X2 [Fragaria vesca subsp. vesca] [Fragaria vesca]	/	/	-4.03242	/
RchiOBHm_Chr4g0402601	XA21	PREDICTED: probable LRR receptor-like serine/threonine-protein kinase At3g47570 isoform X2 [Malus domestica]	/	/	-4.63421	/
RchiOBHm_Chr4g0403281	At3g47570	PREDICTED: LRR receptor-like serine/threonine-protein kinase EFR [Fragaria vesca subsp. vesca] [Fragaria vesca]	/	/	-2.30666	-2.1452
RchiOBHm_Chr2g0114281	XA21	PREDICTED: probable LRR receptor-like serine/threonine-protein kinase At3g47570 [Fragaria vesca subsp. vesca] [Fragaria vesca]	/	/	-1.39987	/
RchiOBHm_Chr2g0104671	SAPK10	PREDICTED: serine/threonine-protein kinase SRK2I [Fragaria vesca subsp. vesca] [Fragaria vesca]	/	/	1.52312	/
RchiOBHm_Chr7g0190891	NDPK2	PREDICTED: nucleoside diphosphate kinase 2, chloroplastic [Fragaria vesca subsp. vesca] [Fragaria vesca]	/	/	-2.70343	/
RchiOBHm_Chr2g0132201	DGK5	PREDICTED: diacylglycerol kinase 5 isoform X2 [Fragaria vesca subsp. vesca] [Fragaria vesca]	/	/	-3.55772	-1.13132
RchiOBHm_Chr2g0096101	FAB1B	PREDICTED: 1-phosphatidylinositol-3-phosphate 5-kinase FAB1A [Fragaria vesca subsp. vesca] [Fragaria vesca]	/	/	-1.67089	/
RchiOBHm_Chr2g0152191	--	PREDICTED: diacylglycerol kinase 5-like [Jatropha curcas]	/	/	-5.18057	/
RchiOBHm_Chr6g0294851	PIP5K1	PREDICTED: phosphatidylinositol 4-phosphate 5-kinase 1 [Fragaria vesca subsp. vesca] [Fragaria vesca]	/	/	-1.53505	/
MSTRG.19425	SAPK10	serine/threonine protein kinase 3 [Medicago sativa]	/	/	-6.36632	/
RchiOBHm_Chr1g0343991	--	PREDICTED: nucleoside diphosphate kinase IV, chloroplastic/mitochondrial-like [Juglans regia]	/	/	-2.48452	/
RchiOBHm_Chr7g0242741	SAPK2	PREDICTED: serine/threonine-protein kinase SAPK2-like [Fragaria vesca subsp. vesca] [Fragaria vesca]	/	/	-3.33039	-2.22803
RchiOBHm_Chr6g0290241	NEK2	PREDICTED: serine/threonine-protein kinase Nek2 [Fragaria vesca subsp. vesca] [Fragaria vesca]	/	/	-4.43347	/
RchiOBHm_Chr1g0357191	At1g01540	PREDICTED: probable serine/threonine-protein kinase At1g01540 [Fragaria vesca subsp. vesca] [Fragaria vesca]	/	/	-2.32166	/
RchiOBHm_Chr4g0444341	PBL28	PREDICTED: serine/threonine-protein kinase PBS1 [Fragaria vesca subsp. vesca] [Fragaria vesca]	/	/	-3.2414	/
RchiOBHm_Chr7g0192581	STY13	PREDICTED: serine/threonine-protein kinase HT1 [Fragaria vesca subsp. vesca] [Fragaria vesca]	/	/	-1.74418	/
RchiOBHm_Chr6g0284731	Os01g0541900	PREDICTED: protein kinase and PP2C-like domain-containing protein [Fragaria vesca subsp. vesca] [Fragaria vesca]	/	/	-1.71012	/
RchiOBHm_Chr4g0425351	SIS8	PREDICTED: serine/threonine-protein kinase WNK2-like isoform X1 [Fragaria vesca subsp. vesca] [Fragaria vesca]	/	/	-1.5924	/
RchiOBHm_Chr5g0011141	XA21	PREDICTED: probable LRR receptor-like serine/threonine-protein kinase At5g48740 isoform X1 [Prunus mume]	/	/	/	2.70044
RchiOBHm_Chr6g0306681	HSL1	PREDICTED: probable LRR receptor-like serine/threonine-protein kinase At1g56130 [Prunus mume]	/	/	/	-1.62071
RchiOBHm_Chr5g0012091	RKF1	PREDICTED: receptor-like protein kinase 5 [Fragaria vesca subsp. vesca] [Fragaria vesca]	/	/	/	1.17218
All data are shown log2 Ratio, and positive and negative values of Log2 Ratio are either up- or down-regulated genes in the four pair-comparisons. No significant fold changes are indicated as “/”
