# Supplementary material for: Comparative Transcriptome and Weighted Gene Co-expression Network Analysis Identify Key Transcription Factors of Rosa chinensis ‘Old Blush’ After Exposure to a Gradual Drought Stress Followed by Recovery
Source: Front Genet. 2021 Jul 15;12:690264. doi: 10.3389/fgene.2021.690264 (PMC8320538; doi:10.3389/fgene.2021.690264)
Supplement: Supplementary Table 6 — ROS producing and scavenging system-related genes that were differentially expressed in response to drought treatment. [file Table_6.XLSX]

## Sheet: Sheet1
Supplementary table 6 ROS producing and scavenging system-related genes that were differentially expressed in response to drought treatment
Gene id	Gene name	Description	Log2 fold change(DT1/CK)	Log2 fold change(DT2/CK)	Log2 fold change(DT3/CK)	Log2 fold change(RW/CK)
RchiOBHm_Chr2g0099111	APX3	PREDICTED: L-ascorbate peroxidase 3, peroxisomal-like [Fragaria vesca subsp. vesca] [Fragaria vesca]	1.57382	2.84645	/	2.73252
RchiOBHm_Chr7g0218251	GST1	PREDICTED: glutathione S-transferase zeta class-like [Fragaria vesca subsp. vesca] [Fragaria vesca]	1.89169	/	-2.68061	1.5238
RchiOBHm_Chr5g0007721	PPO	PREDICTED: polyphenol oxidase, chloroplastic-like [Fragaria vesca subsp. vesca] [Fragaria vesca]	-1.24854	/	/	-1.72587
RchiOBHm_Chr5g0007731	PPO	PREDICTED: polyphenol oxidase, chloroplastic-like [Malus domestica]	-1.26403	-1.15968	-2.88135	/
RchiOBHm_Chr5g0071231	PFE2	PREDICTED: ferritin-4, chloroplastic-like [Prunus mume]	-1.16993	-2.29418	-4.02354	-1.54354
RchiOBHm_Chr3g0461811	PFE	PREDICTED: ferritin-3, chloroplastic [Fragaria vesca subsp. vesca] [Fragaria vesca]	-1.67992	/	/	-4.41947
RchiOBHm_Chr6g0311131	GRXC6	PREDICTED: glutaredoxin-C6 [Fragaria vesca subsp. vesca] [Fragaria vesca]	-1.72851	-2.51059	-5.08974	-2.17282
RchiOBHm_Chr2g0098631	POD64	PREDICTED: peroxidase 64 [Fragaria vesca subsp. vesca] [Fragaria vesca]	5.64252	4.0199	/	7.0905
RchiOBHm_Chr5g0003181	POD42	PREDICTED: peroxidase 42 [Fragaria vesca subsp. vesca] [Fragaria vesca]	2.33421	/	-6.52532	3.11275
RchiOBHm_Chr5g0034661	POD47	PREDICTED: peroxidase 47 [Fragaria vesca subsp. vesca] [Fragaria vesca]	2.28353	1.89028	-2.4955	1.08565
RchiOBHm_Chr3g0461001	PNC1	PREDICTED: cationic peroxidase 1-like [Fragaria vesca subsp. vesca] [Fragaria vesca]	2.76777	1.24604	1.10319	1.44552
RchiOBHm_Chr2g0107511	POD73	PREDICTED: peroxidase 73 [Fragaria vesca subsp. vesca] [Fragaria vesca]	2.57597	2.58127	1.75019	1.70917
RchiOBHm_Chr2g0170391	POD63	PREDICTED: peroxidase 63 [Fragaria vesca subsp. vesca] [Fragaria vesca]	2.86982	1.47444	/	1.8416
RchiOBHm_Chr1g0376321	POD66	PREDICTED: peroxidase 66 [Fragaria vesca subsp. vesca] [Fragaria vesca]	3.85031	/	/	3.50413
RchiOBHm_Chr4g0400821	POD45	PREDICTED: peroxidase 45-like [Fragaria vesca subsp. vesca] [Fragaria vesca]	4.7879	/	/	/
RchiOBHm_Chr6g0299121	POD46	PREDICTED: peroxidase 46-like [Fragaria vesca subsp. vesca] [Fragaria vesca]	1.47897	/	/	/
RchiOBHm_Chr2g0112481	POD17	PREDICTED: peroxidase 17-like [Fragaria vesca subsp. vesca] [Fragaria vesca]	-2.77052	/	/	-9.59495
RchiOBHm_Chr2g0159291	ACO3	PREDICTED: aconitate hydratase, cytoplasmic [Fragaria vesca subsp. vesca] [Fragaria vesca]	/	1.09268	1.37398	/
RchiOBHm_Chr3g0468551	APX2	PREDICTED: L-ascorbate peroxidase 2, cytosolic-like [Fragaria vesca subsp. vesca] [Fragaria vesca]	/	1.25293	/	/
RchiOBHm_Chr7g0241981	--	GATA transcription factor-like protein [Arabidopsis thaliana]	/	2.81084	/	/
RchiOBHm_Chr6g0292871	GRXC11	PREDICTED: glutaredoxin-C11 [Fragaria vesca subsp. vesca] [Fragaria vesca]	/	-4.10046	-10.5379	3.21591
RchiOBHm_Chr5g0056701	SODCP	PREDICTED: superoxide dismutase [Cu-Zn], chloroplastic [Pyrus x bretschneideri]	/	-1.52391	-3.36132	/
RchiOBHm_Chr6g0297961	APX1	peroxidase domain-containing protein [Cephalotus follicularis]	/	-1.0277	-4.12491	/
RchiOBHm_Chr6g0303681	CDSP32	PREDICTED: thioredoxin-like protein CDSP32, chloroplastic [Fragaria vesca subsp. vesca] [Fragaria vesca]	/	-1.08806	-3.79421	/
RchiOBHm_Chr6g0307941	At1g07700	PREDICTED: thioredoxin-like 4, chloroplastic [Fragaria vesca subsp. vesca] [Fragaria vesca]	/	-1.81302	-3.29169	/
RchiOBHm_Chr1g0325731	CITRX	PREDICTED: thioredoxin-like protein CITRX, chloroplastic [Fragaria vesca subsp. vesca] [Fragaria vesca]	/	-1.25298	-3.88685	/
RchiOBHm_Chr1g0372651	TRX9	PREDICTED: thioredoxin H9 [Fragaria vesca subsp. vesca] [Fragaria vesca]	/	-2.80735	/	/
RchiOBHm_Chr2g0100181	TRX1	PREDICTED: thioredoxin H-type [Fragaria vesca subsp. vesca] [Fragaria vesca]	/	-1.02819	/	/
RchiOBHm_Chr2g0103261	Os03g0767500	PREDICTED: thioredoxin-like protein HCF164, chloroplastic [Fragaria vesca subsp. vesca] [Fragaria vesca]	/	-1.41948	/	-1.25668
RchiOBHm_Chr2g0108751	--	PREDICTED: thioredoxin-like protein AAED1, chloroplastic [Fragaria vesca subsp. vesca] [Fragaria vesca]	/	-1.85723	-3.19384	/
RchiOBHm_Chr2g0126351	At4g03520	PREDICTED: thioredoxin M-type, chloroplastic [Fragaria vesca subsp. vesca] [Fragaria vesca]	/	5.74819	4.18982	6.33762
RchiOBHm_Chr2g0170331	FTRC	PREDICTED: ferredoxin-thioredoxin reductase catalytic chain, chloroplastic [Fragaria vesca subsp. vesca] [Fragaria vesca]	/	-1.01378	-1.35649	/
RchiOBHm_Chr2g0130331	PNC1	PREDICTED: peroxidase P7-like [Fragaria vesca subsp. vesca] [Fragaria vesca]	/	-1.59279	-7.89856	/
RchiOBHm_Chr3g0469141	POD21	PREDICTED: peroxidase 21 [Fragaria vesca subsp. vesca] [Fragaria vesca]	/	8.04075	10.0901	/
RchiOBHm_Chr4g0444711	POD65	PREDICTED: peroxidase 31-like [Ziziphus jujuba]	/	6.99095	6.7866	4.66676
RchiOBHm_Chr5g0072281	PNC1	PREDICTED: cationic peroxidase 1-like [Fragaria vesca subsp. vesca] [Fragaria vesca]	/	9.29155	11.0701	/
RchiOBHm_Chr5g0072351	PNC1	PREDICTED: peroxidase P7-like [Fragaria vesca subsp. vesca] [Fragaria vesca]	/	-1.70093	-8.51898	/
RchiOBHm_Chr7g0209291	PNC2	PREDICTED: peroxidase N1-like [Fragaria vesca subsp. vesca] [Fragaria vesca]	/	5.06301	/	/
RchiOBHm_Chr4g0408201	GPX2	PREDICTED: probable phospholipid hydroperoxide glutathione peroxidase [Prunus mume]	/	/	2.4772	/
RchiOBHm_Chr2g0088361	POD25	PREDICTED: peroxidase 25 [Fragaria vesca subsp. vesca] [Fragaria vesca]	/	/	-4.91488	/
RchiOBHm_Chr6g0301711	POD9	PREDICTED: peroxidase 9 [Fragaria vesca subsp. vesca] [Fragaria vesca]	/	/	3.71097	/
RchiOBHm_Chr6g0274401	POD12	PREDICTED: peroxidase 12 [Fragaria vesca subsp. vesca] [Fragaria vesca]	/	/	4.80476	/
RchiOBHm_Chr2g0095781	PRXQ	PREDICTED: peroxiredoxin Q, chloroplastic [Fragaria vesca subsp. vesca] [Fragaria vesca]	/	/	-4.60038	/
RchiOBHm_Chr3g0471981	PRXIIE	PREDICTED: peroxiredoxin-2E-2, chloroplastic [Fragaria vesca subsp. vesca] [Fragaria vesca]	/	/	-2.0808	/
RchiOBHm_Chr4g0417421	PRXIIF	PREDICTED: peroxiredoxin-2F, mitochondrial [Fragaria vesca subsp. vesca] [Fragaria vesca]	/	/	-2.24225	/
RchiOBHm_Chr6g0296151	APXT	PREDICTED: probable L-ascorbate peroxidase 6, chloroplastic isoform X2 [Fragaria vesca subsp. vesca] [Fragaria vesca]	/	/	-2.24699	/
RchiOBHm_Chr6g0252201	APX3	PREDICTED: L-ascorbate peroxidase 3, peroxisomal [Fragaria vesca subsp. vesca] [Fragaria vesca]	/	/	-1.49931	/
RchiOBHm_Chr6g0251981	APX3	PREDICTED: L-ascorbate peroxidase 3, peroxisomal [Fragaria vesca subsp. vesca] [Fragaria vesca]	/	/	2.10692	/
RchiOBHm_Chr7g0197981	GPX8	PREDICTED: probable phospholipid hydroperoxide glutathione peroxidase isoform X2 [Fragaria vesca subsp. vesca] [Fragaria vesca]	/	/	-1.79919	/
RchiOBHm_Chr1g0370951	PFE2	PREDICTED: ferritin-4, chloroplastic [Fragaria vesca subsp. vesca] [Fragaria vesca]	/	/	-3.05421	/
RchiOBHm_Chr1g0371971	SOD	PREDICTED: superoxide dismutase [Mn], mitochondrial [Fragaria vesca subsp. vesca] [Fragaria vesca]	/	/	-1.57088	/
RchiOBHm_Chr3g0452901	SODCC	PREDICTED: superoxide dismutase [Cu-Zn] [Fragaria vesca subsp. vesca] [Fragaria vesca]	/	/	-1.42335	/
All data are shown log2 Ratio, and positive and negative values of Log2 Ratio are either up- or down-regulated genes in the four pair-comparisons. No significant fold changes are indicated as “/”
